# Supplementary material
Source: PubMed Central journal article supplement (PMC7236624)
Supplement: NIHMS1587628-supplement-Supplementary_File.pdf [file NIHMS1587628-supplement-Supplementary_File.pdf]

**Supplemental Materials**

**Supplemental Table 1: Changes in Diastolic Function Parameters Over Time According to Treatment Regimen**

| <b>Echocardiographic Parameter</b> | <b>Time since initiation of cancer therapy</b> | <b>Doxorubicin Mean Change (95% CI)</b> | <b>P-value</b> | <b>Trastuzumab Mean Change (95% CI)</b> | <b>P-value</b> | <b>Doxorubicin+ Trastuzumab Mean Change (95% CI)</b> | <b>P-value</b> |
|------------------------------------|------------------------------------------------|-----------------------------------------|----------------|-----------------------------------------|----------------|------------------------------------------------------|----------------|
| <b>Deceleration time</b>           | 6 months                                       | -9.0<br>(-12.9, -5.0)                   | <0.001         | -11.0<br>(-16.1, -5.8)                  | <0.001         | -1.9<br>(-7.9, 4.0)                                  | 0.524          |
|                                    | 12 months                                      | -2.9<br>(-7.9, 2.2)                     | 0.267          | -6.0<br>(-11.6, -0.5)                   | 0.034          | 4.8<br>(-0.9, 10.6)                                  | 0.101          |
|                                    | 24 months                                      | 4.0<br>(-1.0, 9.0)                      | 0.117          | 1.0<br>(-6.5, 8.4)                      | 0.797          | 8.1<br>(-1.4, 17.6)                                  | 0.093          |
|                                    | 36 months                                      | 7.0<br>(1.6, 12.4)                      | 0.011          | 3.9<br>(-6.6, 14.4)                     | 0.468          | 12.2<br>(0.3, 24.1)                                  | 0.044          |
| <b>IVRT (msec)</b>                 | 6 months                                       | 0.8<br>(-1.9, 3.5)                      | 0.580          | 2.7<br>(-1.8, 7.2)                      | 0.242          | 0.1<br>(-3.0, 3.2)                                   | 0.944          |
|                                    | 12 months                                      | 4.5<br>(0.5, 8.5)                       | 0.026          | 1.6<br>(-2.6, 5.8)                      | 0.449          | 0.6<br>(-3.7, 4.9)                                   | 0.778          |
|                                    | 24 months                                      | 2.5<br>(-0.7, 5.8)                      | 0.130          | 4.1<br>(-2.9, 11.2)                     | 0.250          | 1.4<br>(-3.3, 6.1)                                   | 0.568          |
|                                    | 36 months                                      | 0.2<br>(-3.7, 4.1)                      | 0.929          | 5.3<br>(-4.3, 14.8)                     | 0.279          | 2.0<br>(-3.6, 7.7)                                   | 0.479          |
| <b>TR Velocity (m/s)</b>           | 6 months                                       | 0.0<br>(-0.0, 0.0)                      | 0.960          | 0.0<br>(-0.0, 0.1)                      | 0.470          | 0.1<br>(0.0, 0.1)                                    | 0.014          |
|                                    | 12 months                                      | -0.0<br>(-0.1, 0.0)                     | 0.419          | 0.0<br>(-0.1, 0.1)                      | 0.896          | 0.0<br>(-0.0, 0.1)                                   | 0.117          |
|                                    | 24 months                                      | -0.0<br>(-0.1, 0.0)                     | 0.627          | -0.0<br>(-0.1, 0.1)                     | 0.949          | 0.0<br>(-0.0, 0.1)                                   | 0.229          |
|                                    | 36 months                                      | 0.0<br>(-0.0, 0.1)                      | 0.553          | 0.0<br>(-0.1, 0.1)                      | 0.852          | 0.0<br>(-0.0, 0.1)                                   | 0.185          |

Dox refers to doxorubicin, IVRT to isovolumic relaxation time Tras to trastuzumab, ,TR to tricuspid regurgitation

**Supplemental Table 2: Associations between Baseline Abnormal Diastolic Function Grade and Change in LVEF, Time to CTRCD and Change in Longitudinal Strain**

| Variable                                       | Change in LVEF* |              |         | Time to Subsequent CTRCD† |            |         | Change in Longitudinal Strain* |              |         |
|------------------------------------------------|-----------------|--------------|---------|---------------------------|------------|---------|--------------------------------|--------------|---------|
|                                                | Beta            | 95% CI       | P-value | HR                        | 95% CI     | P-value | Beta                           | 95% CI       | P-value |
| <b>Baseline Diastolic Function Grade &gt;0</b> | -0.2            | (-1.4, 1.0)  | 0.748   | 1.2                       | (0.6, 2.3) | 0.647   | 0.5                            | (-0.0, 1.0)  | 0.070   |
| <b>Age (10 years)</b>                          | -0.1            | (-0.6, 0.4)  | 0.674   | 0.9                       | (0.7, 1.2) | 0.377   | 0.4                            | (0.2, 0.6)   | 0.001   |
| <b>Hypertension</b>                            | -0.8            | (-2.0, 0.3)  | 0.154   | 1.5                       | (0.8, 2.8) | 0.218   | 0.7                            | (0.2, 1.2)   | 0.005   |
| <b>Current smoker</b>                          | 0.3             | (-2.2, 2.8)  | 0.797   | 0.7                       | (0.2, 2.3) | 0.531   | 0.3                            | (-0.5, 1.2)  | 0.444   |
| <b>BMI (5 kg/m<sup>2</sup>)</b>                | 0.4             | (0.0, 0.8)   | 0.042   | 0.9                       | (0.7, 1.1) | 0.263   | 0.1                            | (-0.1, 0.3)  | 0.467   |
| <b>Baseline LVEF</b>                           | -0.5            | (-0.6, -0.4) | <0.001  | 1.0                       | (1.0, 1.1) | 0.204   | -                              | -            | -       |
| <b>Baseline Longitudinal Strain</b>            | -               | -            | -       | -                         | -          | -       | -0.8                           | (-0.8, -0.7) | <0.001  |

BMI refers to body mass index, CTRCD to cancer therapeutics-related cardiac dysfunction LVEF to left ventricular ejection fraction,.

\*Generalized estimating equation beta coefficient reflects the mean difference in LVEF or longitudinal strain relative to baseline for each variable, adjusted for all variables included in this Table plus treatment regimen and time since cancer therapy initiation interacted with treatment, modeled using cubic splines. There are no effect estimates for treatment due to modeling strategies used.

† Cox proportional hazards model, HR for time to CTRCD, adjusted for all variables included in this Table, and using stratified baseline hazards for treatment regimen. There are no effect estimates for treatment due to modeling strategies used. 52 CTRCD events in this analysis.

**Supplemental Table 3: Associations between Worsening Diastolic Function Grade and Subsequent Changes in LVEF, Time to CTRCD or Subsequent Changes in Longitudinal Strain**

| Variable                                  | Change in LVEF* |              |         | Time to Subsequent CTRCD† |            |         | Change in Longitudinal Strain* |              |         |
|-------------------------------------------|-----------------|--------------|---------|---------------------------|------------|---------|--------------------------------|--------------|---------|
|                                           | Beta            | 95% CI       | P-value | HR                        | 95% CI     | P-value | Beta                           | 95% CI       | P-value |
| <b>Worsening Diastolic Function Grade</b> | -1.4            | (-2.4, -0.4) | 0.006   | 2.2                       | (1.1, 4.3) | 0.028   | 0.3                            | (-0.1, 0.7)  | 0.195   |
| <b>Age (10 years)</b>                     | -0.1            | (-0.7, 0.5)  | 0.797   | 0.8                       | (0.6, 1.2) | 0.256   | 0.5                            | (0.2, 0.7)   | <0.001  |
| <b>Hypertension</b>                       | -1.0            | (-2.2, 0.2)  | 0.092   | 1.3                       | (0.7, 2.9) | 0.464   | 0.8                            | (0.2, 1.3)   | 0.008   |
| <b>Current smoker</b>                     | 1.0             | (-1.2, 3.2)  | 0.84    | 0.8                       | (0.2, 3.4) | 0.739   | 0.5                            | (-0.5, 1.5)  | 0.293   |
| <b>BMI (5 kg/m<sup>2</sup>)</b>           | 0.4             | (-0.1, 0.9)  | 0.148   | 1.0                       | (0.7, 1.3) | 0.827   | 0.1                            | (-0.1, 0.3)  | 0.272   |
| <b>Baseline LVEF</b>                      | -0.4            | (-0.6, -0.3) | <0.001  | 1.0                       | (0.9, 1.1) | 0.951   | -                              | -            | -       |
| <b>Baseline Longitudinal Strain</b>       | -               | -            | -       | -                         | -          | -       | -0.7                           | (-0.8, -0.7) | <0.001  |

BMI refers to body mass index, CTRCD to cancer therapeutics-related cardiac dysfunction, LVEF to left ventricular ejection fraction. Worsening diastolic function is defined by increase in diastolic function grade in patients with diastolic function grade <3 at baseline. In all models, outcome evaluated at the subsequent and not the same visit.

\*Generalized estimating equation beta coefficients reflect the mean difference in LVEF or longitudinal strain relative to baseline for each variable, adjusted for all variables included in this Table plus treatment regimen and time since cancer therapy initiation interacted with treatment, modeled using cubic splines. There are no effect estimates for treatment due to modeling strategies used.

†Cox proportional hazards model, HR for time to CTRCD, adjusted for all variables included in this Table, and using stratified baseline hazards for treatment regimen. There are no effect estimates for treatment due to modeling strategies used. 35 CTRCD events in this analysis.
